# Supplementary material for: Construction of a NiFe-LDH catalyst with a three-dimensional unified gas diffusion layer structure via a facile acid etching route for the oxygen evolution reaction
Source: Royal Society of Chemistry journal article supplement (doi:10.1039/d2qm01300b), 2023-01-01
Supplement: d2qm01300b1.pdf [file d2qm01300b1.pdf]

## Supporting Information

### Construction of NiFe-LDH catalyst with three-dimensional unified gas diffusion layer structure via facile acid etching route for oxygen evolution reaction

Dong Shi, Yajun Ji\*, Faxue Lu, Junnan Yao, Lijun Pei

School of Materials and Chemistry, University of Shanghai for Science and Technology, Jungong Road 334#, 200093 Shanghai, China. E-mail: [jiyajun@usst.edu.cn](mailto:jiyajun@usst.edu.cn)

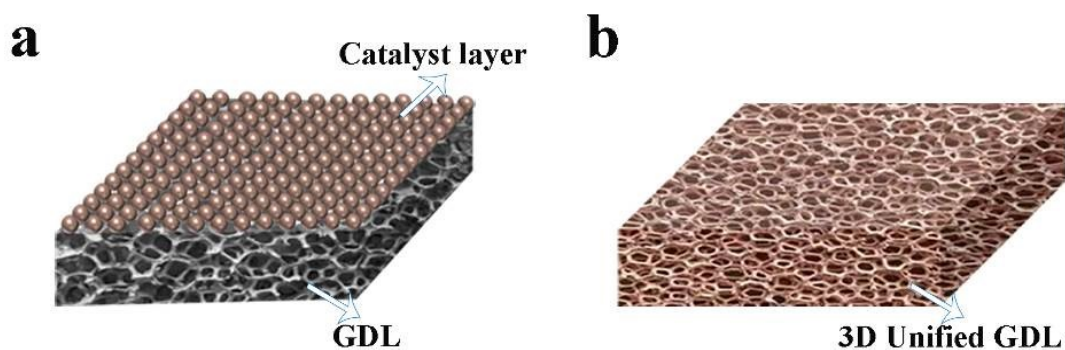

Figure S1. (a) Traditional electrode design, (b) Three-dimensional unified GDL design.

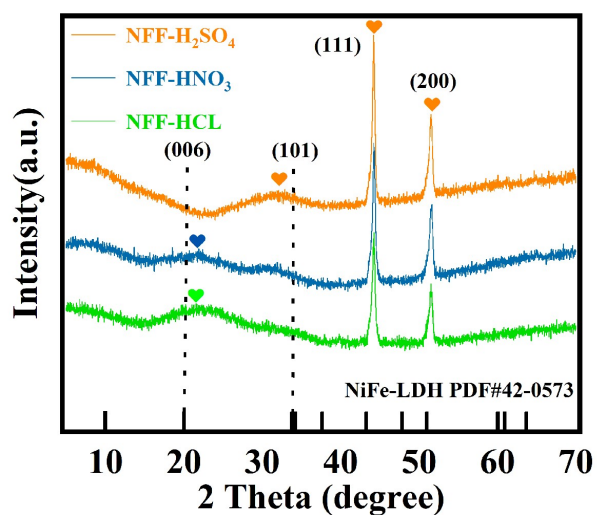

Figure S2. XRD patterns of NFF-H<sub>2</sub>SO<sub>4</sub>, NFF-HNO<sub>3</sub> and NFF-HCL.

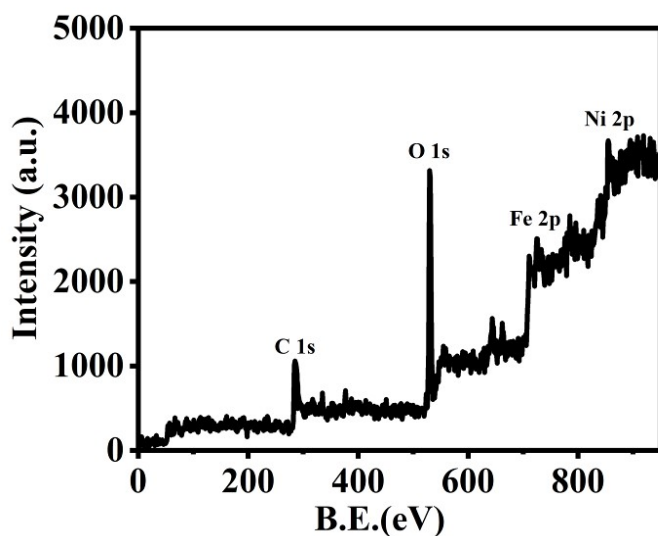

Figure S3. XPS survey spectrum of NFF-H<sub>2</sub>SO<sub>4</sub>.

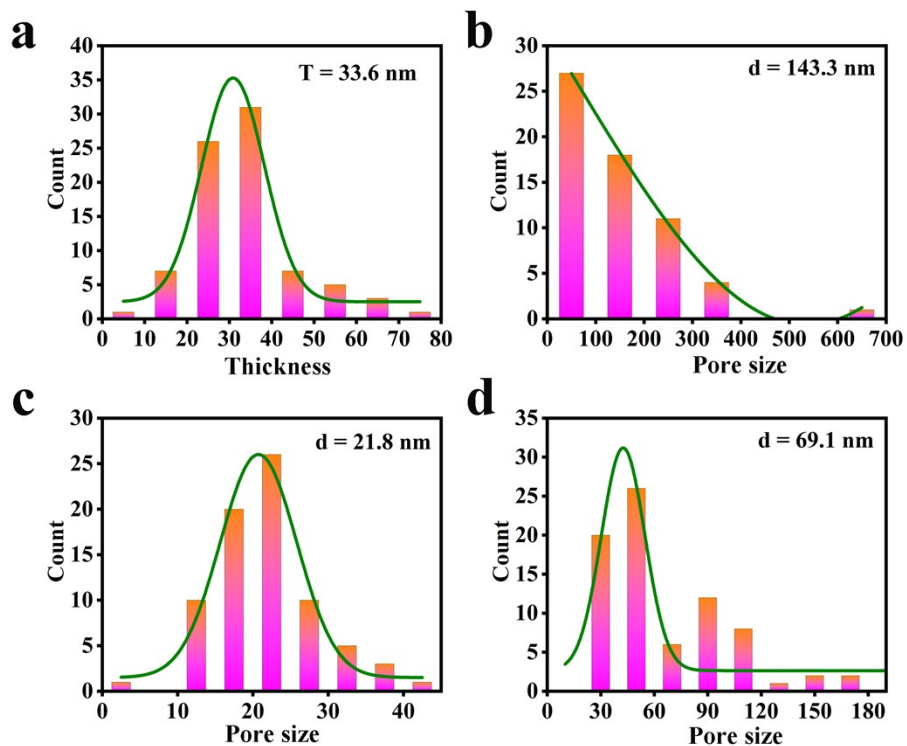

Figure S4. (a) The thickness histogram of NFF-H<sub>2</sub>SO<sub>4</sub> nanosheets. (b) The corresponding pore size histograms for NFF-H<sub>2</sub>SO<sub>4</sub>, (c) NFF-HCL and (d) NFF-HNO<sub>3</sub>.

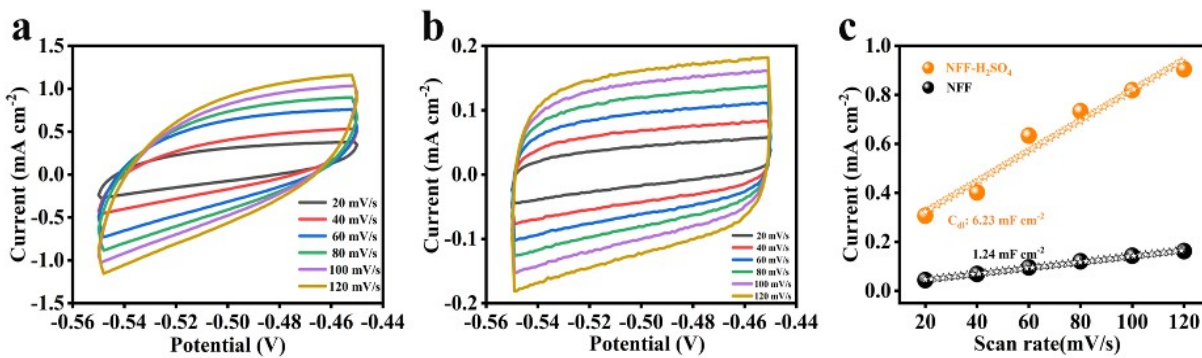

Figure S5. CV curves of (a) NFF-H<sub>2</sub>SO<sub>4</sub>, (b) Bare NFF at different scan rates (20, 40, 60, 80, 100 and 120 mV s<sup>-1</sup>), (c) The corresponding C<sub>dl</sub> curves.

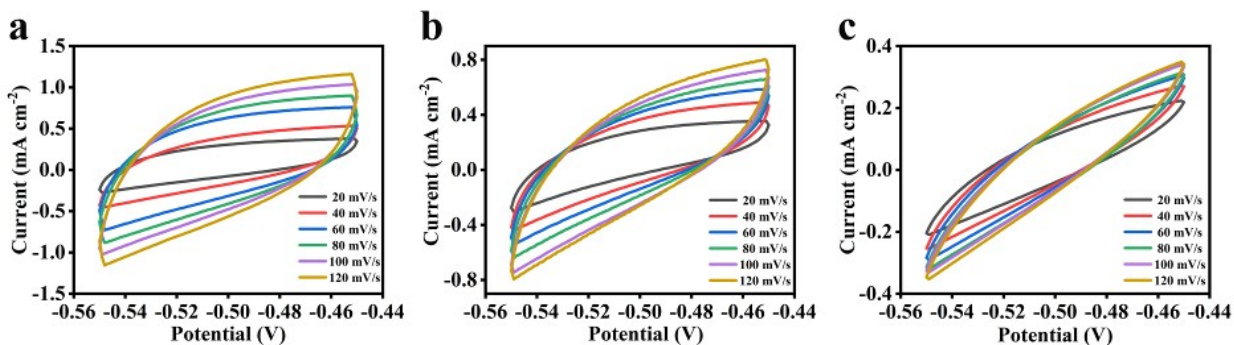

Figure S6. CV curves of (a) NFF-H<sub>2</sub>SO<sub>4</sub>, (b) NFF-HNO<sub>3</sub> and (c) NFF-HCL at scan rates (20, 40, 60, 80, 100 and 120 mV s<sup>-1</sup>).

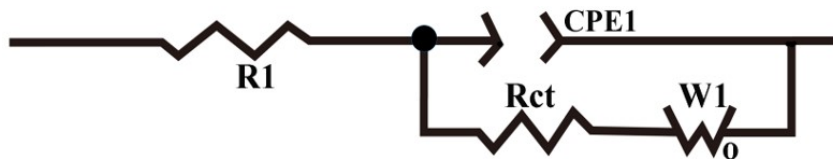

Figure S7. Equivalent circuit diagram for EIS.

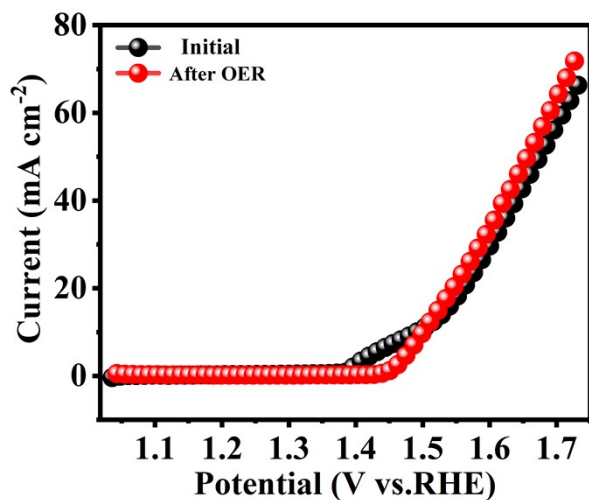

Figure S8. Comparison of LSV curves before and after 12 hours OER.

Table S1. Ni/Fe based catalysts reported in recent literatures at 10 mA cm<sup>-2</sup>.

| Num | Electrocatalyst                                                          | $\eta_{10}$ [mV] | Electrolyte | Substrate | References       |
|-----|--------------------------------------------------------------------------|------------------|-------------|-----------|------------------|
| 1   | NFF-H <sub>2</sub> SO <sub>4</sub>                                       | <b>275</b>       | 1 M KOH     | NFF       | <b>This work</b> |
| 2   | Co-NiFe-LDH                                                              | 278              | 1 M KOH     | GC        | 1                |
| 3   | NiO/C@NiFe-LDH                                                           | 299              | 1 M KOH     | GC        | 2                |
| 4   | NiFe-LDH/CuONRs/CF                                                       | 290              | 1 M KOH     | Cu foil   | 3                |
| 5   | NiFe-LDH@MnCO <sub>3</sub>                                               | 279              | 1 M KOH     | NF        | 4                |
| 6   | F-Ni <sub>2</sub> B/Ni(OH) <sub>x</sub>                                  | 340              | 1 M KOH     | GC        | 5                |
| 7   | (NiFe)S <sub>2</sub> -GN                                                 | 320              | 1 M KOH     | GC        | 6                |
| 8   | NiFe CHs-CNT/G                                                           | 300              | 1 M KOH     | GC        | 7                |
| 9   | NiFe LDH@NDCDs                                                           | 385              | 0.1 M KOH   | NF        | 8                |
| 10  | NiFe PBA@N-CNT                                                           | 280              | 0.1 M KOH   | NF        | 9                |
| 11  | NiFe@C                                                                   | 322              | 1 M KOH     | GC        | 10               |
| 12  | Mn-NiFe-LDHs                                                             | 332              | 1 M KOH     | CP        | 11               |
| 13  | Ni <sub>3</sub> S <sub>2</sub> @FeNi-NiFe <sub>2</sub> O <sub>4</sub> /C | 280              | 1 M KOH     | GC        | 12               |
| 14  | NiFeCr-MOFs                                                              | 333              | 1 M KOH     | GC        | 13               |
| 15  | NiFe-NDC MOFs                                                            | 295              | 1 M KOH     | GC        | 14               |
| 16  | NiFe-Co@NC                                                               | 450              | 0.1 M KOH   | GC        | 15               |
| 17  | NiFe@WC-NCL                                                              | 279              | 1 M KOH     | GC        | 16               |
| 18  | NiFe@NC                                                                  | 277              | 0.1 M KOH   | GC        | 17               |
| 19  | CoNiFeS                                                                  | 288              | 1 M KOH     | GC        | 18               |

## REFERENCES

- 1 S. Si, H. Hu, R. Liu, Z. Xu, C. Wang and Y. Feng, Co-NiFe layered double hydroxide nanosheets as an efficient electrocatalyst for the electrochemical evolution of oxygen, *International Journal of Hydrogen Energy*, 2020, **45**, 9368-9379.
- 2 X. Li, M. Fan, D. Wei, X. Wang and Y. Wang, Core-shell NiO/C@NiFe-LDH nanocomposite as an efficient electrocatalyst for oxygen evolution reaction, *Journal of the Electrochemical Society*, 2020, **167**, 024501.
- 3 Q. Zhou, T. Li, J. Qian, W. Xu, Y. Hu and Y. Zheng, CuO nanorod arrays shelled with amorphous NiFe layered double hydroxide film for enhanced electrocatalytic water oxidation activity, *Acs Applied Energy Materials*, 2018, **1**, 1364-1373.
- 4 R. Rajendiran, N. Muthuchamy, K. H. Park, O. L. Li, H. Kim and K. Prabakar, Self-assembled 3D hierarchical MnCO<sub>3</sub>/NiFe layered double hydroxides as a superior electrocatalysts for the oxygen evolution reactions, *Journal of Colloid and Interface Science*, 2020, **566**, 224-233.
- 5 Y. Hong, K. M. Kim, J. H. Ryu, S. Mhin, J. Kim, G. Ali, K. Y. Chung, S. Kang and H. Han, Dual-phase engineering of nickel boride-hydroxide nanoparticles toward high-performance water oxidation electrocatalysts, *Advanced Functional Materials*, 2020, **30**, 2004330.
- 6 C. Liu, H. Ma, M. Yuan, Z. Yu, J. Li, K. Shi, Z. Liang, Y. Yang, T. Zhu, G. Sun, H. Li and S. Ma, (NiFe)<sub>S-2</sub> nanoparticles grown on graphene as an efficient electrocatalyst for oxygen evolution reaction, *Electrochimica Acta*, 2018, **286**, 195-204.
- 7 Y. Liu, Y. Wang, H. Wen, Y. Han and S. Deng, Green preparation of CNTs/graphite supported NiFe carbonate hydroxides for oxygen evolution reaction, *Chemcatchem*, 2022, e202200453.
- 8 P. Chandrasekaran, T. N. J. I. Edison and M. G. Sethuraman, Electrocatalytic study of carbon dots/ Nickel iron layered double hydroxide composite for oxygen evolution reaction in alkaline medium, *Fuel*, 2022, **320**, 123947.
- 9 S. Aulia, Y. Lin, L. Chang, Y. Wang, M. Lin, K. Ho and M. Yeh, Oxygen plasma-activated

- NiFe prussian blue analogues interconnected N-Doped carbon nanotubes as a bifunctional electrocatalyst for a rechargeable zinc-air battery, *Acs Applied Energy Materials*, 2022, **5**, 9801-9810.
- 10 X. Wu, F. Yang and G. Shen, NiFe single atom catalysts anchored on carbon for oxygen evolution reaction, *International Journal of Hydrogen Energy*, 2022, **47**, 18955-18962.
  - 11 Z. Sun, Y. Liu, D. Ding, L. Luo, Z. Li, M. Yuan and G. Sun, Manganese-doped nickel-iron bimetallic hydroxide catalyst for efficient electrocatalytic oxygen evolution reaction, *Chinese Science Bulletin-Chinese*, 2022, **67**, 2423-2430.
  - 12 L. Xu, S. A. Shah, H. Khan, R. Sayyar, X. Shen, I. Khan, A. Yuan, W. Yaseen, Z. A. Ghazi, A. Naeem, H. Ullah, X. Li and C. Wang, Ni<sub>3</sub>S<sub>2</sub> nanostrips@FeNi-NiFe<sub>2</sub>O<sub>4</sub> nanoparticles embedded in N-doped carbon microsphere: An improved electrocatalyst for oxygen evolution reaction, *Journal of Colloid and Interface Science*, 2022, **617**, 1-10.
  - 13 Y. Zhang, Y. Mo, S. Wang, H. Zhong, Z. Cao and X. Ma, Preparation of NiFeCr-based trimetal organic frameworks as electrocatalyst for direct use in oxygen evolution reaction, *Colloids and Surfaces a-Physicochemical and Engineering Aspects*, 2022, **642**, 128469.
  - 14 H. Zhao, L. Zhang, L. Dai, F. Yao, Y. Huang, J. Deng, Y. Fu, J. Zhu and J. Sun, Regulating the transformation behavior of nickel iron metal-organic frameworks through a dual-ligand strategy for enhanced oxygen evolution reaction performance, *Applied Surface Science*, 2022, **592**, 153252.
  - 15 B. Zhu, J. Li, Z. Hou, C. Meng, G. Liu, X. Du and Y. Guan, MOF-derived nitrogen-doped carbon-based trimetallic bifunctional catalysts for rechargeable zinc-air batteries, *Nanotechnology*, 2022, **33**, 405403.
  - 16 B. Wang, Y. Ai, Y. Yao, M. Jiang, L. Yan, S. Xu and W. Sun, Electrochemical synergy between FeNi nanoalloy@tungsten carbide on N-doped graphitized carbon layers as an excellent electrocatalyst for oxygen evolution reaction, *Electrochimica Acta*, 2022, **415**, 140254.
  - 17 X. Zhang, J. Wang, C. Dai, X. Jin, Y. Zhao and L. Qu, Binary active sites of nickel-iron

alloy bonded in nitrogen-doped carbon nanocage for robust durability and low polarization zinc-air batteries, *Journal of Power Sources*, 2022, **538**, 231563.

- 18 H. Cheng, H. Zhou, Y. Zhuang, B. Chen, J. Chen and A. Yuan, Controllable synthesis and phase-dependent electrocatalytic oxygen evolution performance of CoNiFe sulfide nanocubes, *Journal of Alloys and Compounds*, 2022, **909**, 164774.
